# Supplementary material
Source: PubMed Central journal article supplement (PMC7581248)
Supplement: ao0c04062_si_001.pdf [file ao0c04062_si_001.pdf]

*Supporting Information File*

# **Biophysical elucidation of fibrillation inhibition by sugar osmolytes in $\alpha$ -lactalbumin: Multispectroscopic and molecular docking approaches.**

**Sania Bashir<sup>a</sup>, Anas Shamsi<sup>a</sup>, Faizan Ahmad<sup>a</sup>, Md. Imtaiyaz Hassan<sup>a</sup> Mohammad Azhar Kamal<sup>b,c</sup> and Asimul Islam<sup>a\*</sup>**

<sup>a</sup>*Centre for Interdisciplinary Research in Basic Sciences, Jamia Millia Islamia, Jamia Nagar, New Delhi 110025, India.*

<sup>b</sup>*Department of Biochemistry, College of Science, University of Jeddah, Jeddah, 21589, Saudi Arabia.*

<sup>c</sup>*University of Jeddah Centre for Scientific and Medical Research (UJ-CSMR), University of Jeddah, Jeddah, 21589, Saudi Arabia.*

**\*Author to whom correspondence should be addressed.**

**Dr. Asimul Islam**

Centre for Interdisciplinary Research in Basic Sciences,  
Jamia Millia Islamia,  
New Delhi, India-110025

**Phone:** +91-9312812007

**Email:** aislam@jmi.ac.in

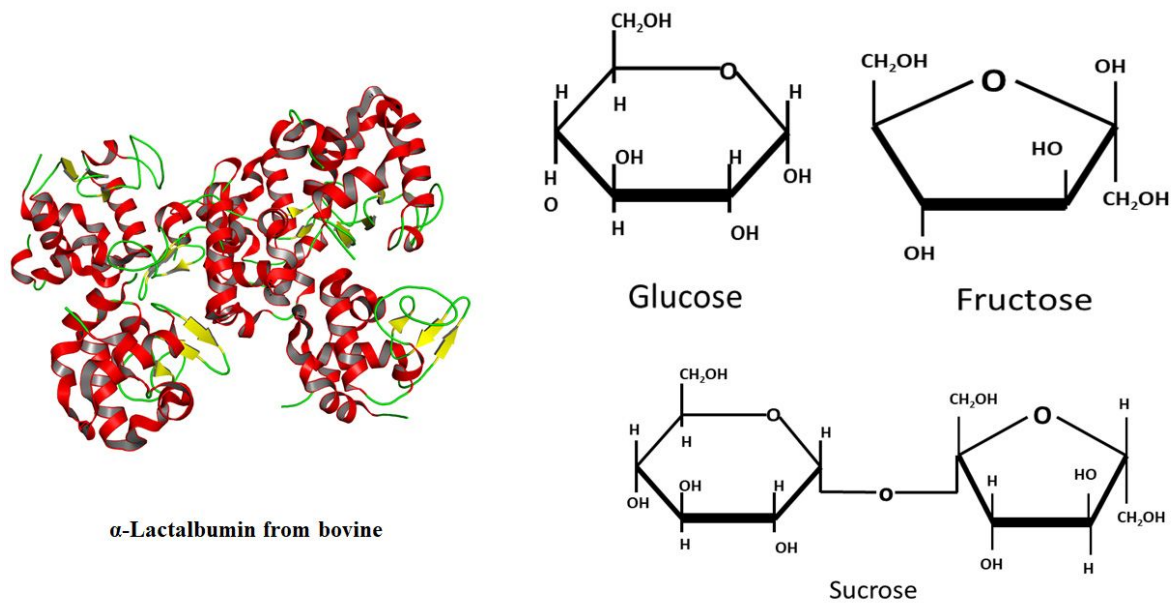

**Figure S1:** Structure of  $\alpha$ -LA and sugar osmolytes (mono & di-saccharide).
